# Supplementary material for: CD4+ effector T cells accelerate Alzheimer’s disease in mice
Source: PubMed Central journal article supplement (PMC8603581; doi:10.1186/s12974-021-02308-7), 2021-11-19
Supplement: 12974_2021_2308_MOESM1_ESM.pdf [file 12974_2021_2308_MOESM1_ESM.pdf]

# Additional file 1

## **CD4+ effector T cells accelerate Alzheimer's disease in mice**

Jatin Machhi<sup>\*1</sup>, Pravin Yeapuri<sup>1</sup>, Yaman Lu<sup>1</sup>, Emma Foster<sup>2</sup>, Rupesh Chikhale<sup>3</sup>, Jonathan Herskovitz<sup>4</sup>, Krista L. Namminga<sup>1</sup>, Katherine E. Olson<sup>1</sup>, Mai Mohamed Abdelmoaty<sup>5,6</sup>, Ju Gao<sup>1</sup>, Rolen M. Quadros<sup>1,7</sup>, Tomomi Kiyota<sup>8</sup>, Liang Jingjing<sup>1</sup>, Bhavesh D. Kevadiya<sup>1</sup>, Xinglong Wang<sup>1</sup>, Yutong Liu<sup>1,9</sup>, Larisa Y Poluektova<sup>1</sup>, Channabasavaiah B. Gurumurthy<sup>1,7</sup>, R Lee Mosley<sup>1</sup>, Howard E Gendelman<sup>1,5\*</sup>

<sup>1</sup>*Department of Pharmacology and Experimental Neuroscience, University of Nebraska Medical Center, Omaha, NE 68198, USA*

<sup>2</sup>*Department of Biological Sciences, Northern Kentucky University, Highland Heights, KY 41099, USA*

<sup>3</sup>*University College London School of Pharmacy, Bloomsbury, London WC1E 6DE, UK*

<sup>4</sup>*Department of Pathology and Microbiology, College of Medicine, University of Nebraska Medical Center, Omaha, NE 68198, USA*

<sup>5</sup>*Department of Pharmaceutical Sciences, College of Pharmacy, University of Nebraska Medical Center, NE 68198, USA*

<sup>6</sup>*Therapeutic Chemistry Department, Pharmaceutical and Drug Industries Research Division, National Research Centre, Giza, Egypt*

<sup>7</sup>*Mouse Genome Engineering Core Facility, Vice Chancellor for Research Office, University of Nebraska Medical Center, Omaha, Nebraska, USA*

<sup>8</sup>*Department of Safety Assessment, Genentech Inc., South San Francisco, CA 94080, USA*

<sup>9</sup>*Department of Radiology, University of Nebraska Medical Center, Omaha, NE 68198, USA*

### **Corresponding authors:**

Howard E. Gendelman, Department of Pharmacology and Experimental Neuroscience, University of Nebraska Medical Center, Omaha, NE 6898-5880; phone 402-559-8920; fax 402-559-3744.

Email [hegendel@unmc.edu](mailto:hegendel@unmc.edu) (for review and correspondence)

Jatin Machhi, Department of Pharmacology and Experimental Neuroscience, University of Nebraska Medical Center, Omaha, NE 6898-5880; phone 402-559-2779.

Email [jatin.machhi@unmc.edu](mailto:jatin.machhi@unmc.edu) (shared correspondence).

**a**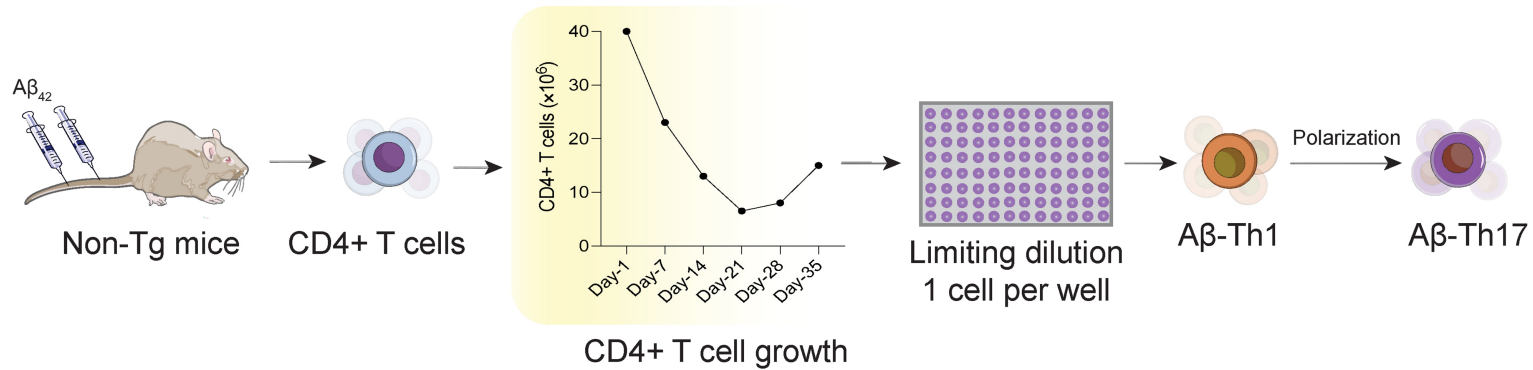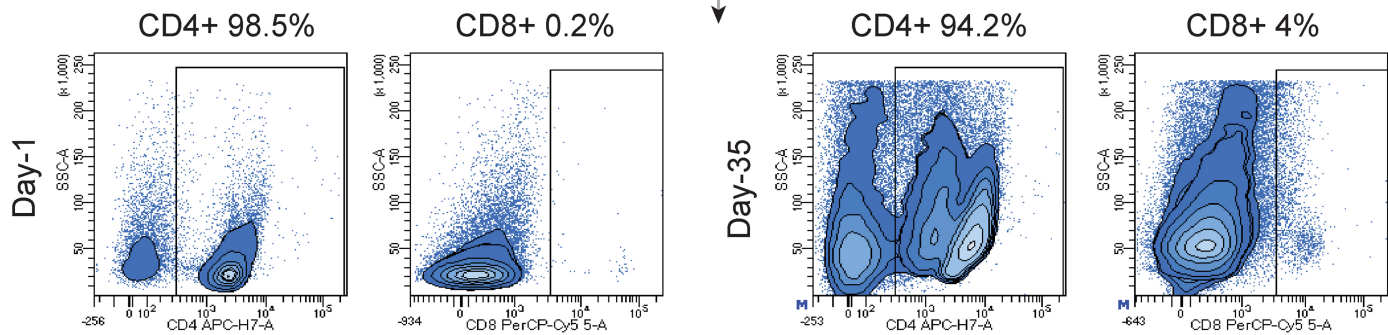**b**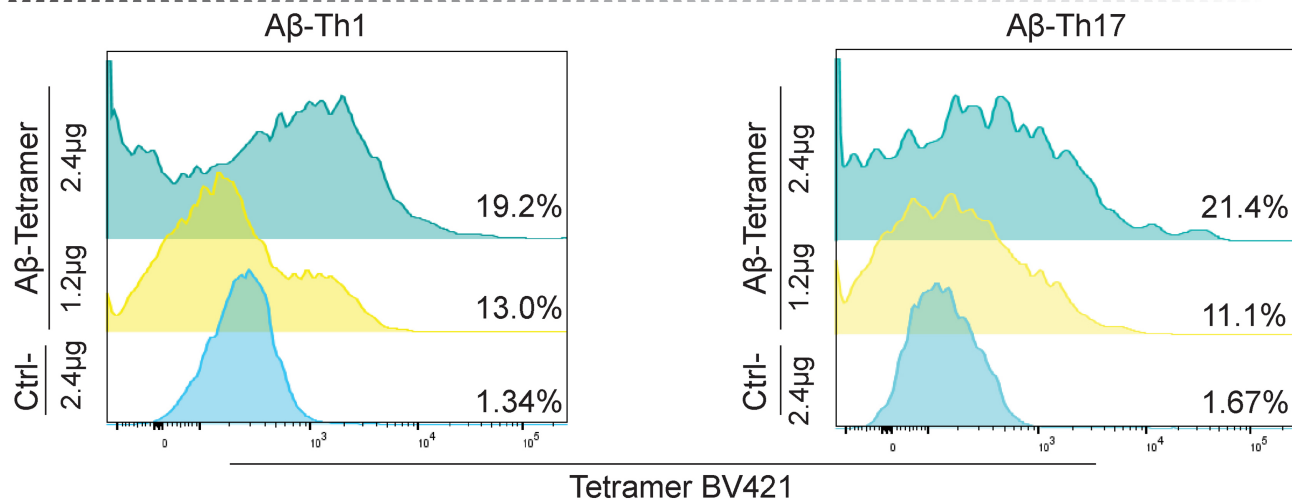

**Fig. S1. Development of monoclonal A $\beta$ -Th1 and A $\beta$ -Th17 cells.** (a) Workflow showing development of antigen-specific T cells. Non-Tg mice immunized with A $\beta_{1-42}$  followed by isolation of CD4<sup>+</sup> T cells from spleen and lymph nodes. In vitro culture of CD4<sup>+</sup> T cells in the presence of feeder cells and A $\beta_{1-42}$  for enrichment of antigen-rich population. Growth pattern of CD4<sup>+</sup> T cells over in vitro incubation where cells growth declined for a several weeks followed by increased cell number without compromising CD4<sup>+</sup> T cell purity (shown as % of CD3<sup>+</sup> cells). Limiting dilution culture to seed as low as 1 cell per well in presence of feeder cells, A $\beta_{1-42}$ , and IL2 to obtain A $\beta$ -Th1 cell clone. A $\beta$ -Th1 cells polarized into A $\beta$ -Th17 cells using conditional culture media in presence of feeder cells and A $\beta_{1-42}$ . (b) Staining of three-month propagated A $\beta$ -Th1 and A $\beta$ -Th17 cells with two concentrations of MHCII-IA<sup>b</sup>-KLVFFAEDVGSNKGA (A $\beta$  T cell epitope) tetramer after incubation at 37 °C for 3 hr. Control tetramer MHCII-IA<sup>b</sup>-PVSKMRMATPLLMQA (Ctrl) was used to determine non-specific binding of T cells.

**a**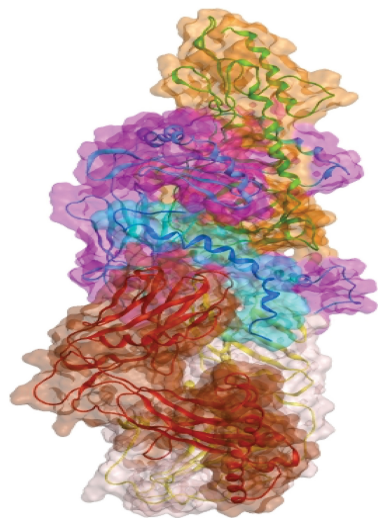**ii.**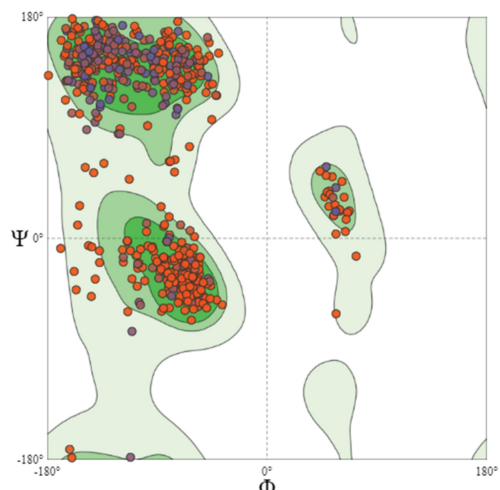**iii.**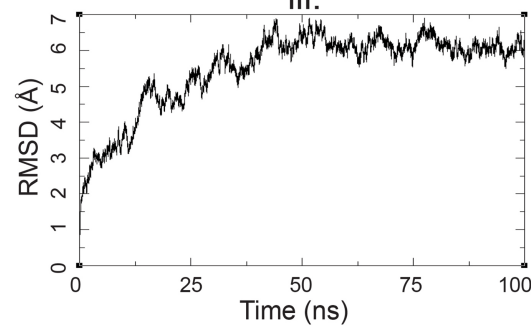**iv.**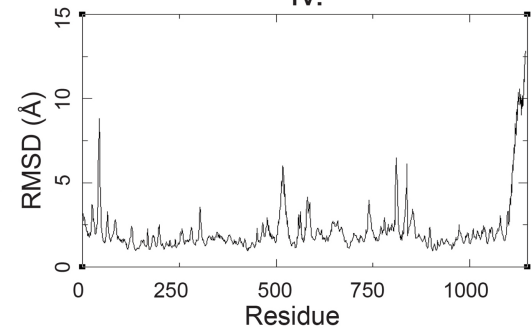**b****i.**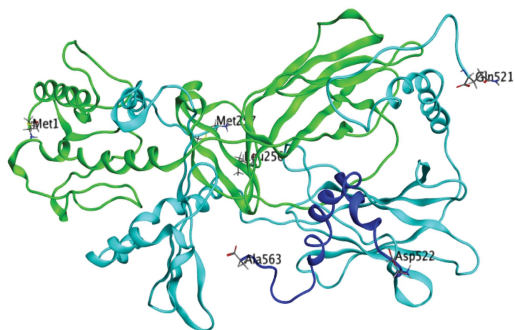**ii.**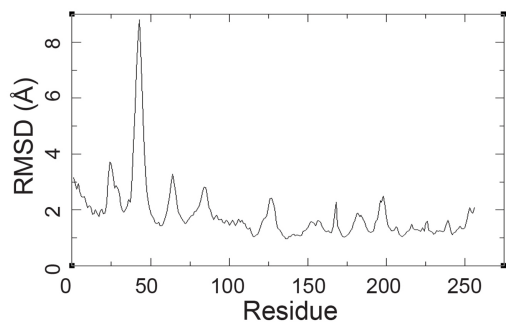**iii.**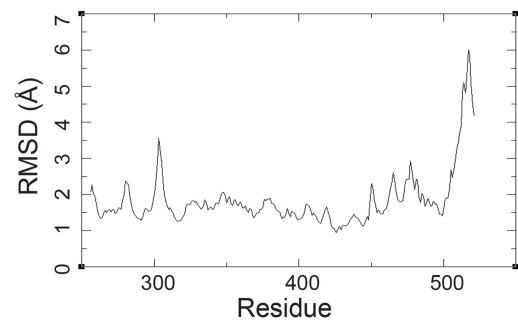**c****i.**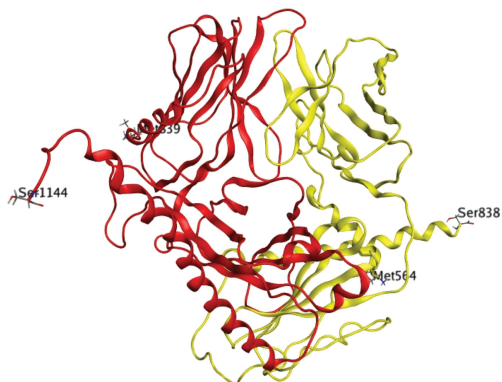**ii.**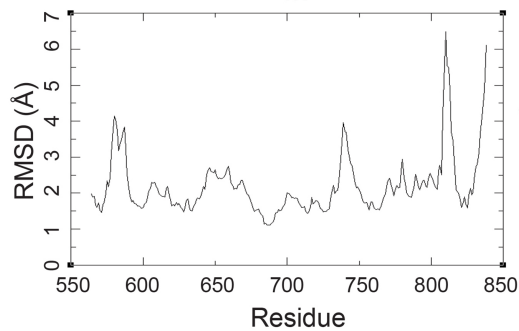**iii.**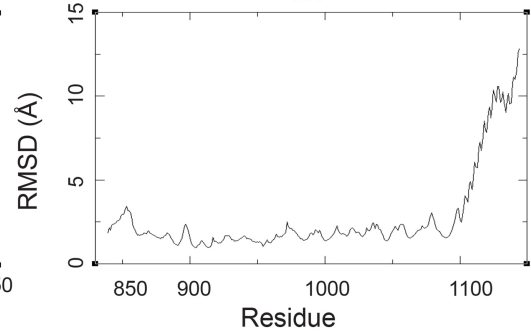**iv.**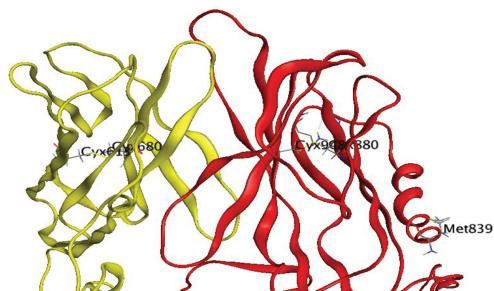**v.**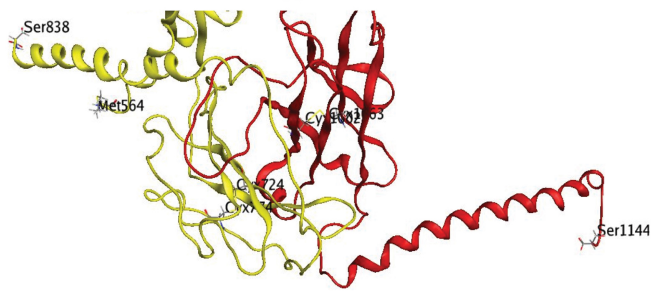

**Fig. S2. Modelling and explicit solvent molecular dynamics simulations.** (a) (i) TCR-pMHC complex with surface interactions (post MD production); (ii) Ramachandran plot for the optimized and energetically stabilized model; (iii) RMSD plot for the TCR-pMHC complex for 100 ns MD simulation; (iv) RMSF for complete TCR-pMHC complex over the period of 100 ns MD simulation. (b) (i) pMHC complex from the modelled complex; RMSF for the (ii) MHC $\alpha$  chain and (iii) MHC $\beta$  chain. (c) (i) TCR complex; (ii) RMSF of TCR $\alpha$  chain and (iii) TCR $\beta$  chain from the complex. (iv) Close-up of the Fab (fragment antigen binding) and (v) the Fc (fragment crystallizable) regions.

## Blood

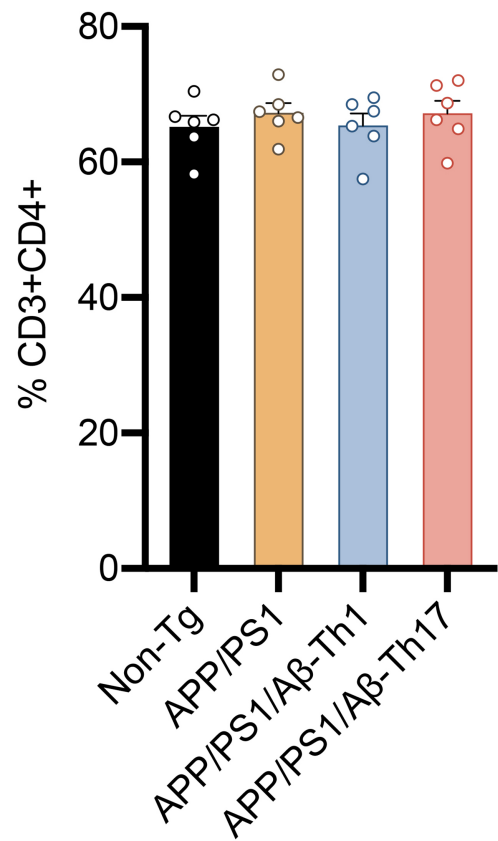

## Spleen

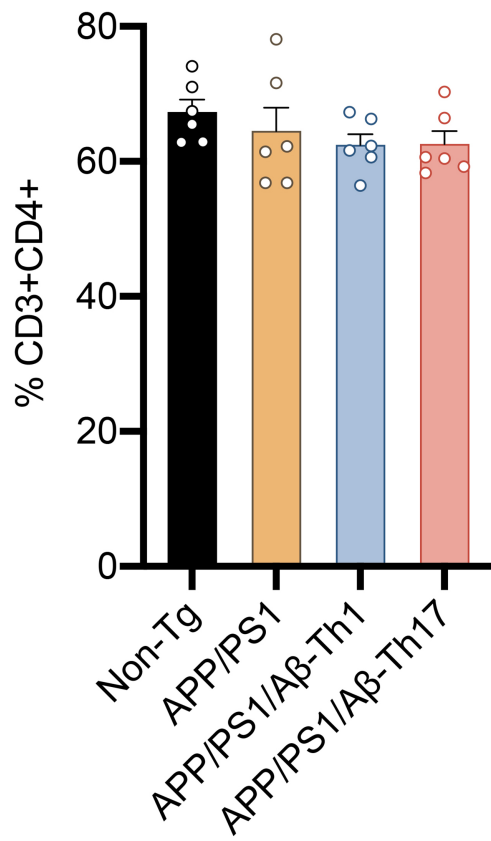

## Lymph nodes

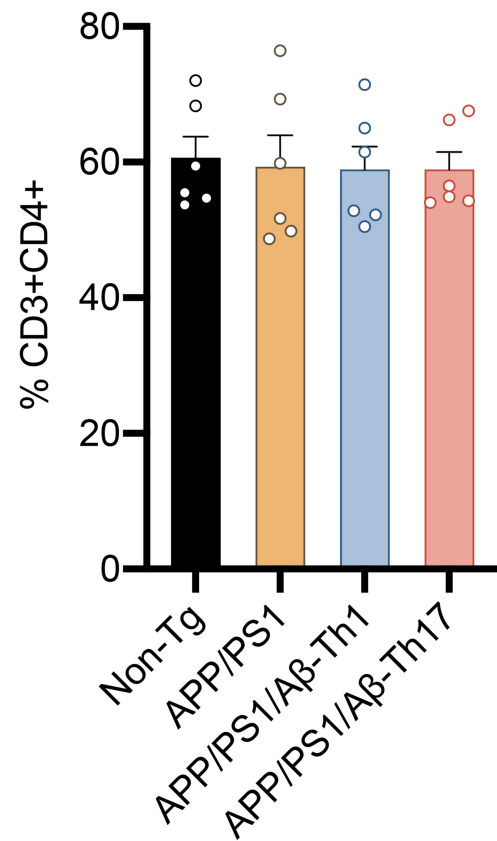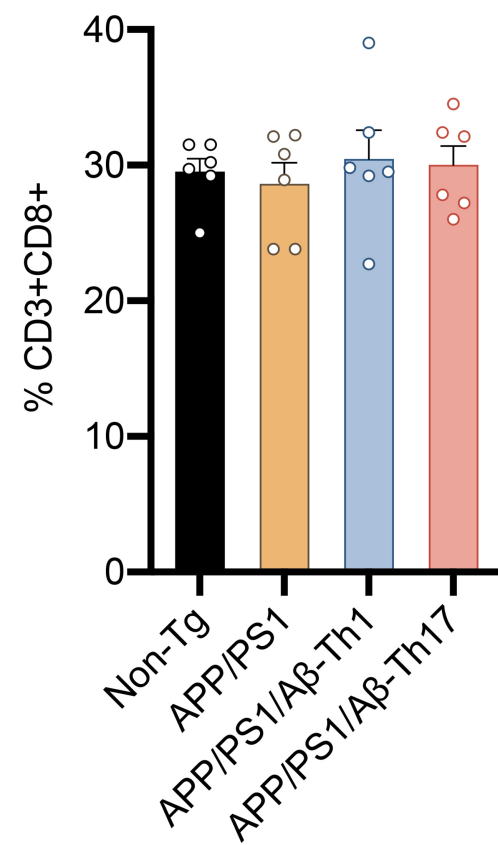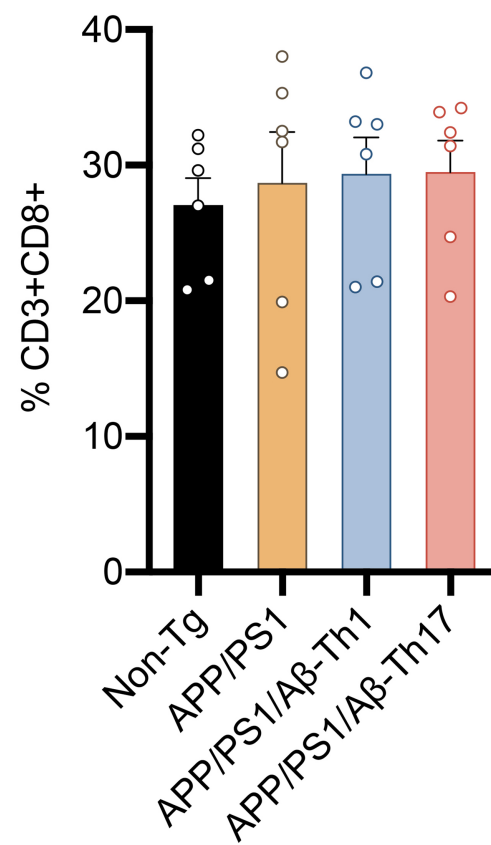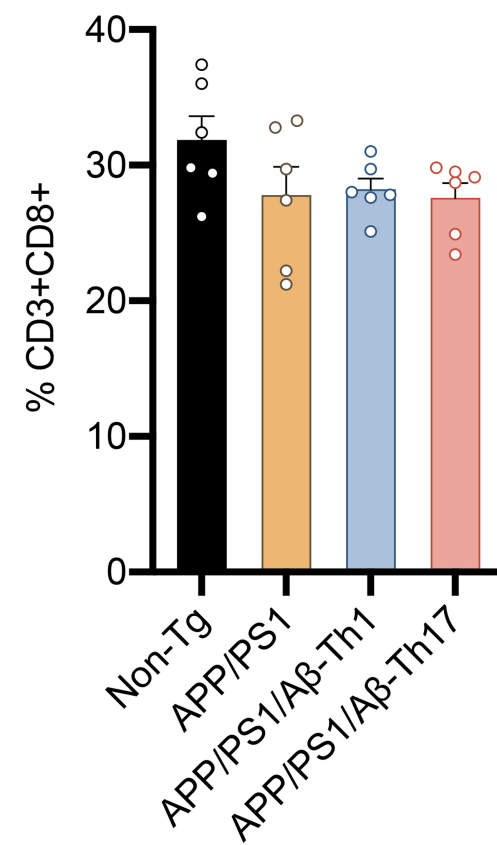

**Fig. S3. Adoptive transfer of A $\beta$ -Teffs did not affect T cell frequency in APP/PS1 mice.** Frequency of CD3+CD4+ and CD3+CD8+ T cells in blood, spleen and lymph nodes by flow cytometric analysis for n=6 mice per group. One-way ANOVA followed by Newman–Keuls post-hoc test was used to determine statistical significance.

APP/PS1

APP/PS1/A $\beta$ -Th1APP/PS1/A $\beta$ -Th17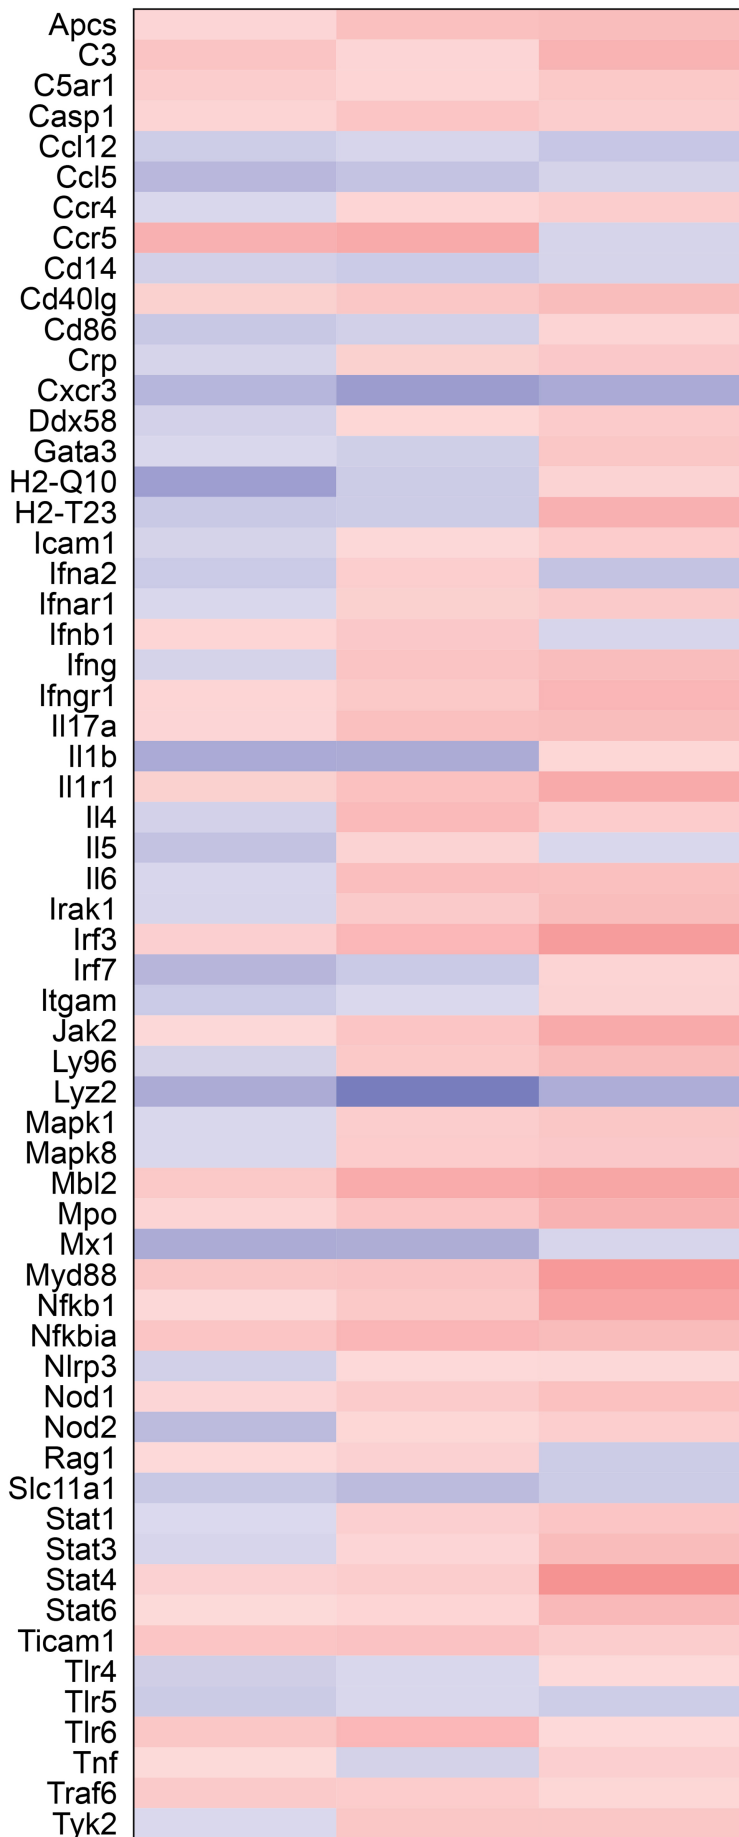Fold regulation  
vs non-Tg

5

0

-5

APP/PS1/A $\beta$ -Th1APP/PS1/A $\beta$ -Th17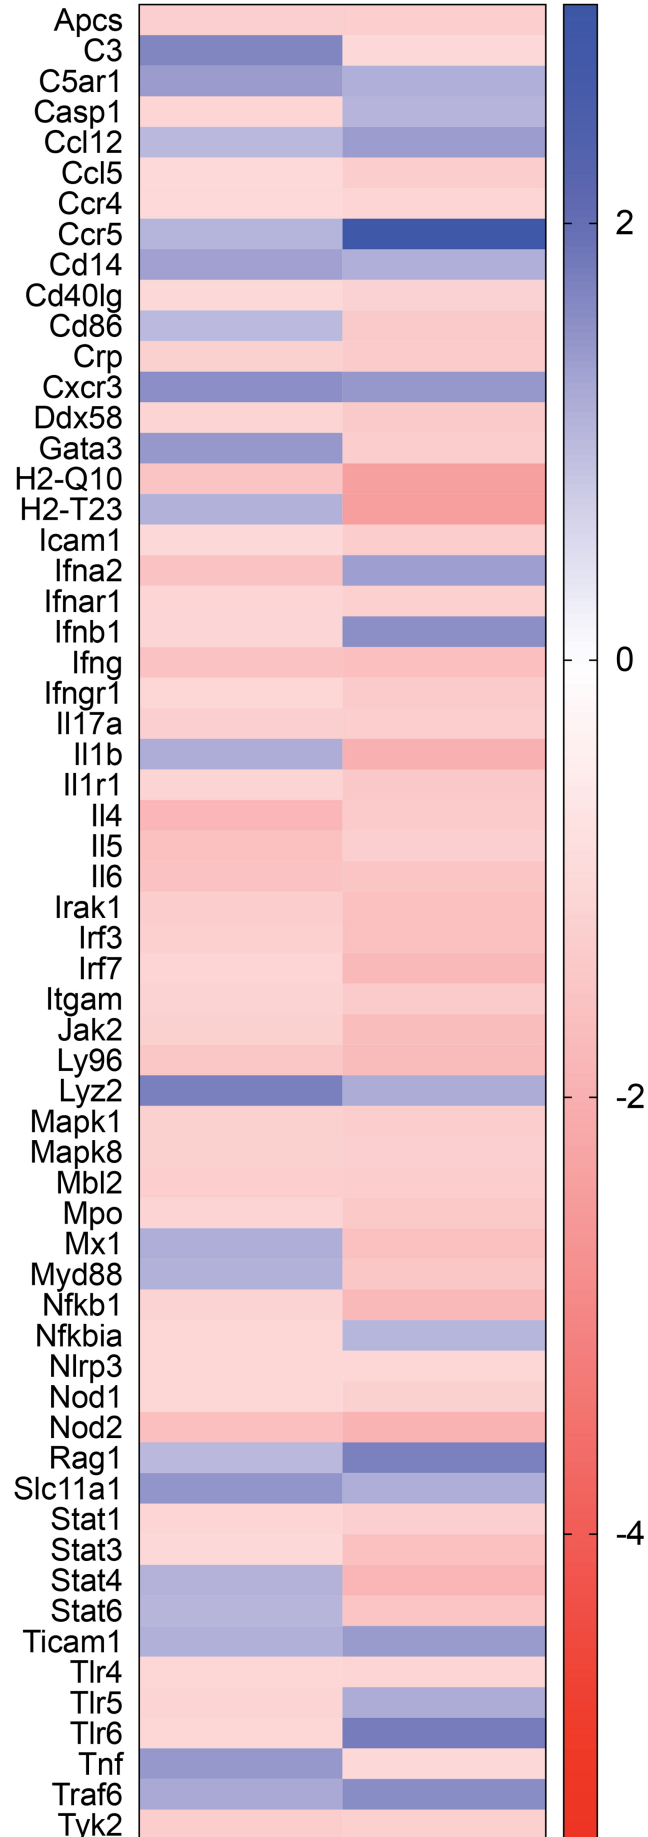Fold regulation  
vs APP/PS1

2

0

-2

-4



**Fig. S4. Transcriptomic analysis of immune genes.** Gene expression of different innate and adaptive immune genes from the hippocampus of each treatment group were assessed in Qiagen RT<sup>2</sup>-PCR arrays. Genes less affected and not covered in **Fig. 5c** are summarized here. (left) Gene expression in different APP/PS1 mice compared to non-Tg mice. (right) Gene expression in APP/PS1/A $\beta$ -Th1 and APP/PS1/A $\beta$ -Th17 mice compared to untreated APP/PS1 mice for n=4 mice per group. Fold changes in different innate and adaptive immune genes are presented as heat maps.

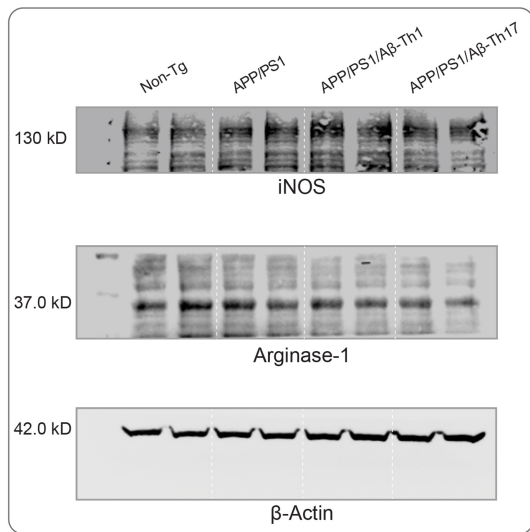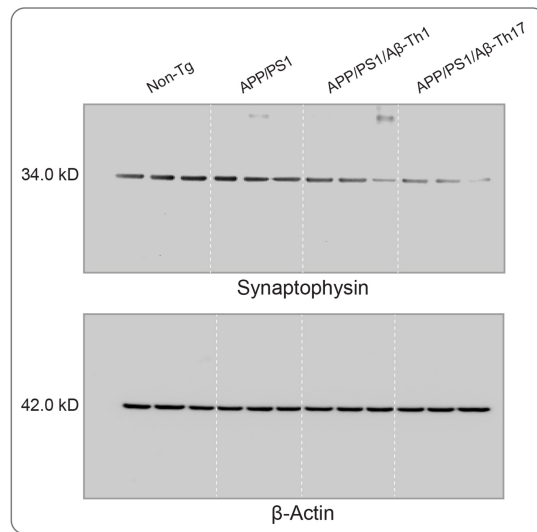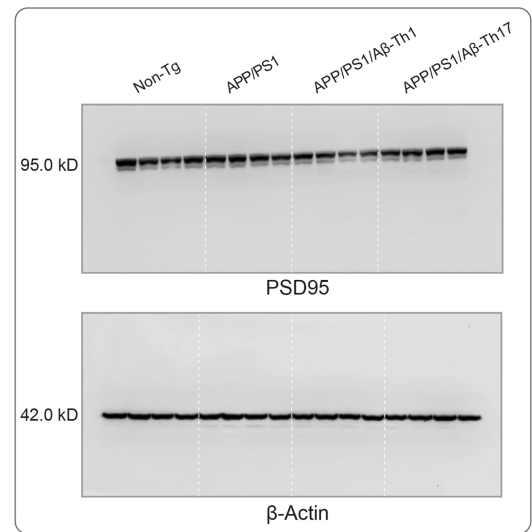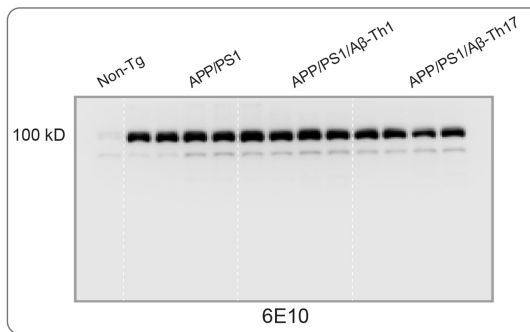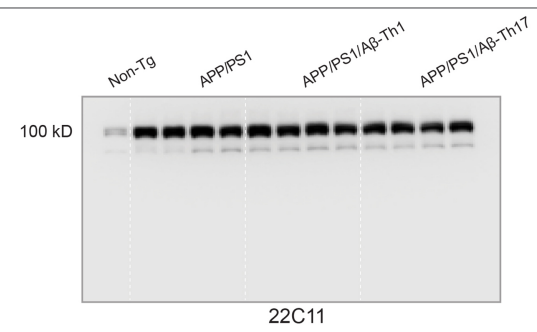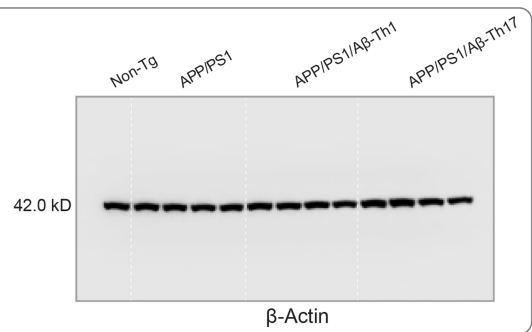

**Fig. S5. Western blot images.** Full blot image of iNOS, arginase-1, synaptophysin, PSD95, 6E10, 22C11 and  $\beta$ -actin protein expression determined from cortical tissues of each treatment group.
